# Supplementary material
Source: publisher figshare collection journal article supplement (https://acs.figshare.com/ndownloader/files/4681870)
Supplement: Supplementary file 1 [file 4681870]

Supplemental material to:

**Kinetic Study of Heterogeneous Reaction of Deliquesced NaCl Particles  
with Gaseous HNO<sub>3</sub> Using Particle-on-Substrate Stagnation Flow  
Reactor Approach**

Y. Liu, J. P. Cain, H. Wang and A. Laskin

*Journal of Physical Chemistry A*, 2007

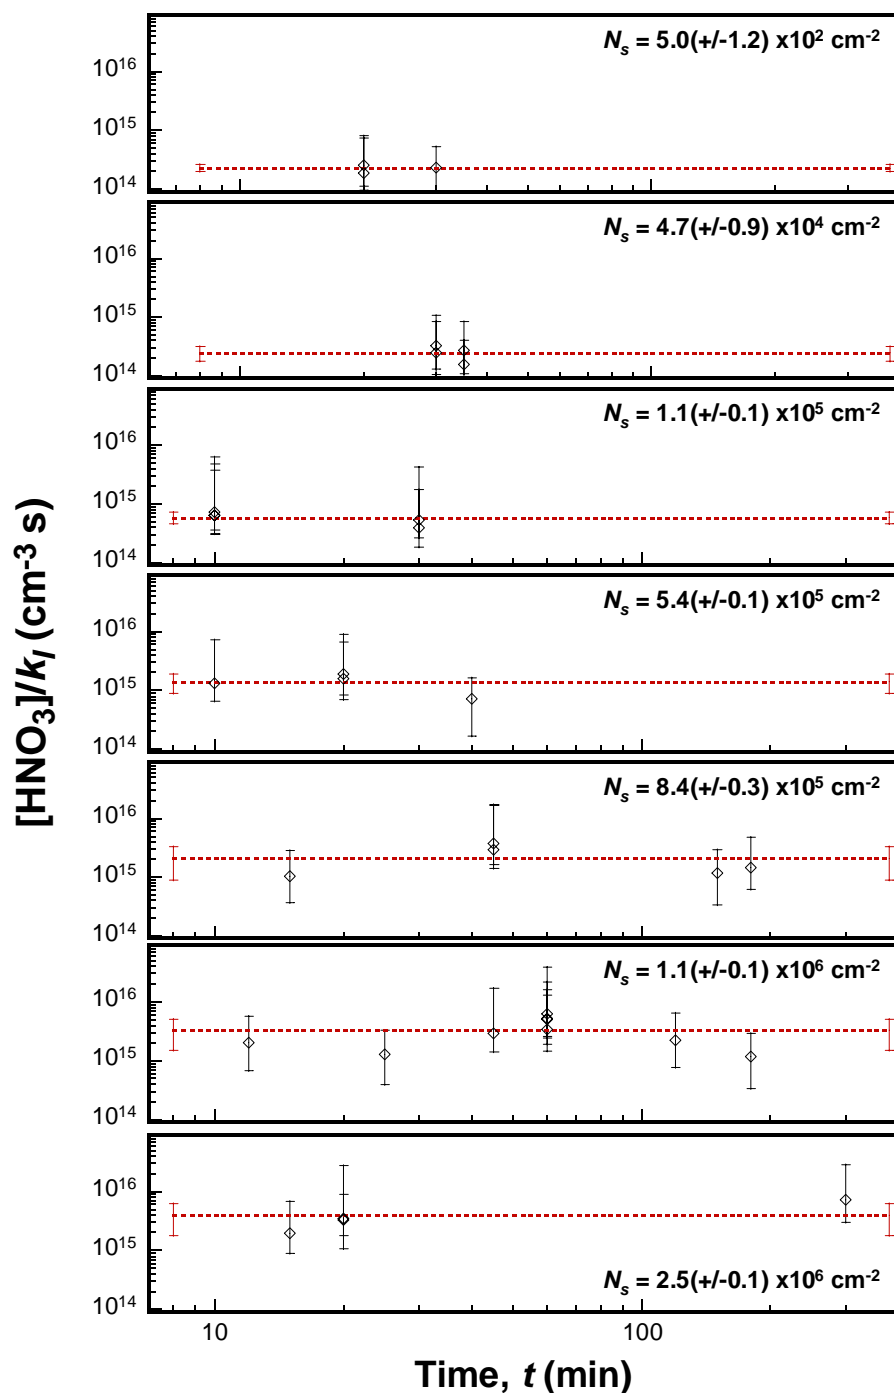

Figure S1. Variations of  $[\text{HNO}_3]/k_I$  as a function of reaction time. Each panel represents measurements selected from series A1, A2, A3 and B1 at a fixed surface number density  $N_s$  value. The error bar on each datum point represents one standard deviation. The dashed line indicates the average of the measured data; the error bars at the left- and rightmost of the line indicating one standard deviation of the  $[\text{HNO}_3]/k_I$  data. As seen, there is no discernible, systematic variation of  $[\text{HNO}_3]/k_I$  as a function of reaction time over the entire range of surface number density employed in the current study.

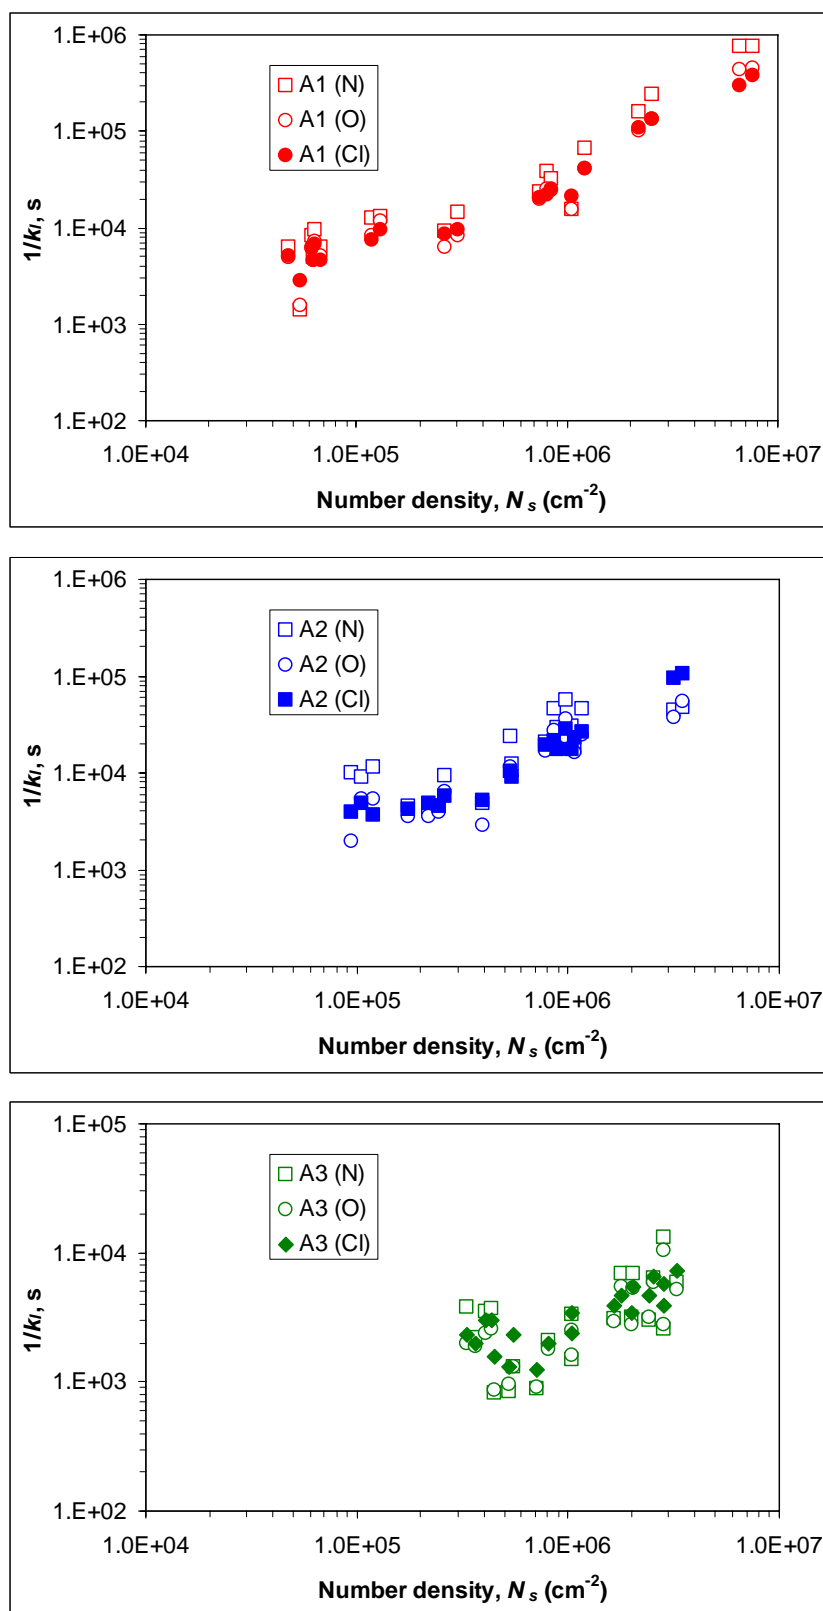

Figure S2. Values of  $1/k_t$  as a function of particle number density on the substrate surface ( $N_s$ ), determined experimentally from Cl depletion (solid symbols), and N (open squares) and O (open circles) enhancements for the three series of experiments (see, Table 2).

The first-order rate constant  $k_I$  may be determined from Cl depletion,

$$k_I = -\frac{1}{t} \ln \left( \frac{[\text{Cl}/\text{Na}]_t^{\text{EDX}}}{[\text{Cl}/\text{Na}]_{t=0}^{\text{EDX}}} \right). \quad (\text{s1})$$

Alternatively, the rate constant may be determined also from O or N enhancement, which are given respectively by

$$k_I = -\frac{1}{t} \ln \left( \frac{[\text{O}/\text{Na}]_{\text{NaNO}_3}^{\text{EDX}} - [\text{O}/\text{Na}]_t^{\text{EDX}}}{[\text{O}/\text{Na}]_{\text{NaNO}_3}^{\text{EDX}} - [\text{O}/\text{Na}]_{t=0}^{\text{EDX}}} \right) \quad (\text{s2})$$

and

$$k_I = -\frac{1}{t} \ln \left( \frac{[\text{N}/\text{Na}]_{\text{NaNO}_3}^{\text{EDX}} - [\text{N}/\text{Na}]_t^{\text{EDX}}}{[\text{N}/\text{Na}]_{\text{NaNO}_3}^{\text{EDX}} - [\text{N}/\text{Na}]_{t=0}^{\text{EDX}}} \right) \quad (\text{s3})$$

Because of background noise of O and N signals even in pure NaCl samples, two references,  $[\text{O or N}/\text{Na}]_{t=0}^{\text{EDX}}$  and  $[\text{O or N}/\text{Na}]_{\text{NaNO}_3}^{\text{EDX}}$ , corresponding to 0% and 100% conversions respectively, are used in equations (s2) and (s3).
